# Supplementary material
Source: Springer Nature journal article supplement (http://www.springermedizin.de/resource/supplementary/12876_2012_981_MOESM2_ESM.pdf/9437836)

a

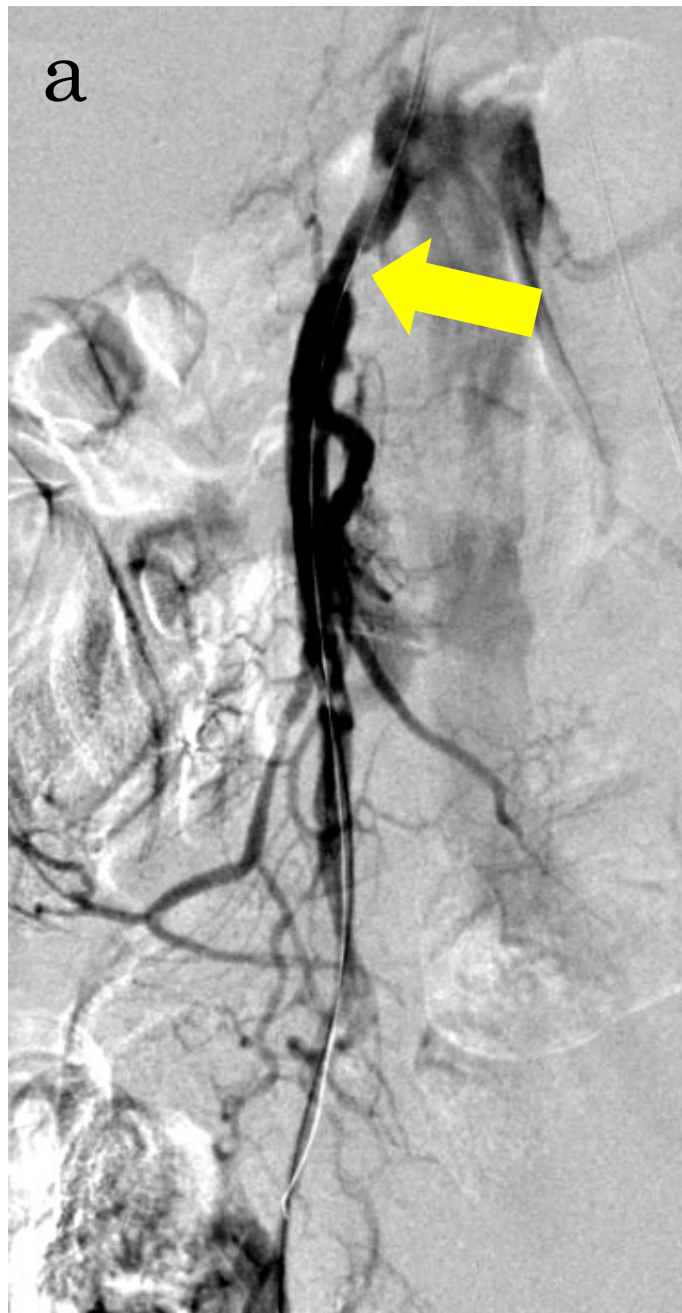

b

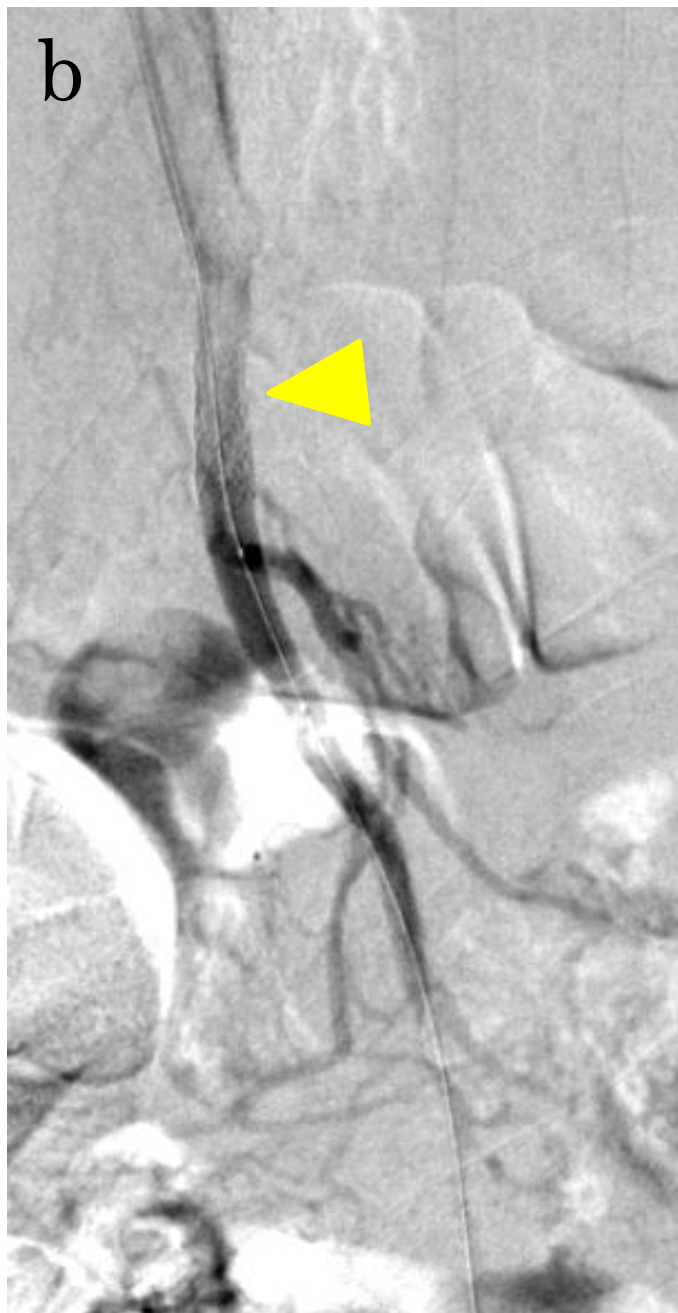

a | b

Supplement: MOESM2 [file 9437836]
